# Supplementary material
Source: PubMed Central journal article supplement (PMC7695578)

# Supplementary Figure

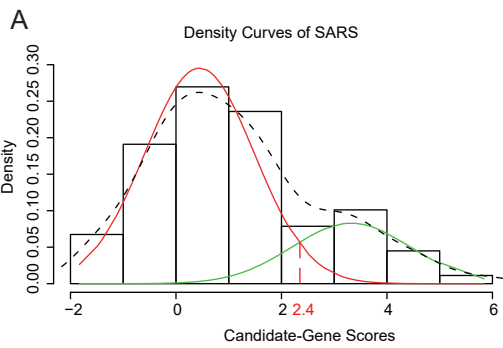

**B**

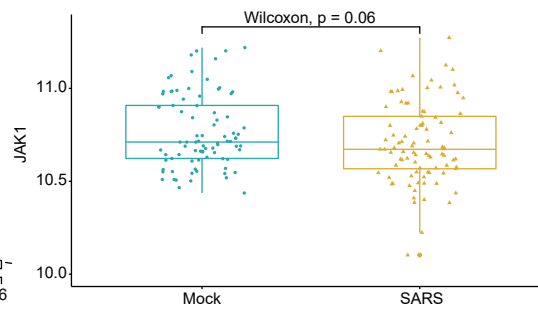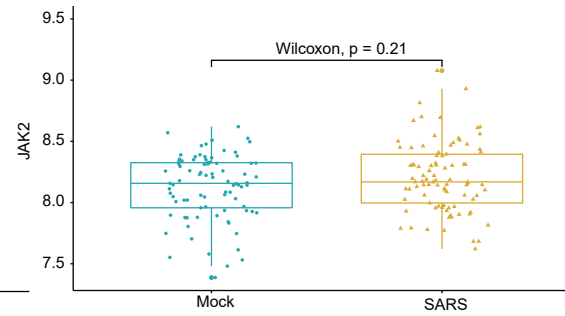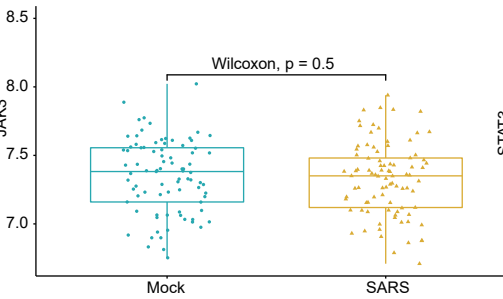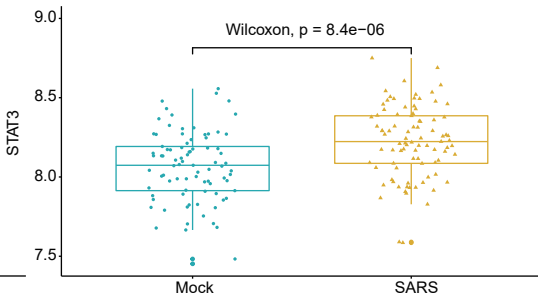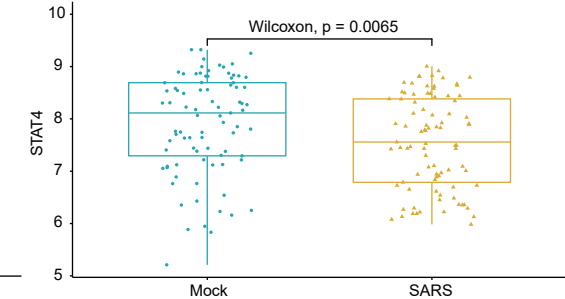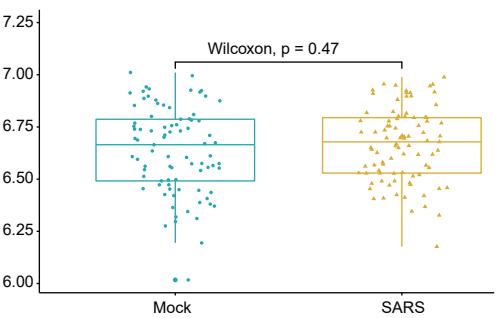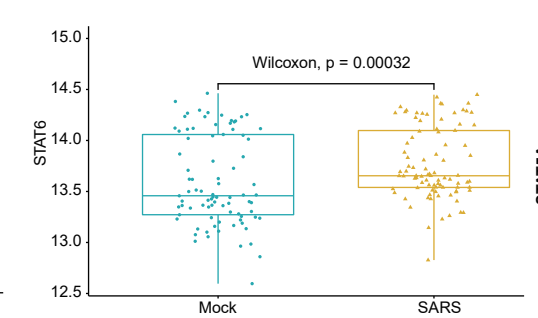

**C Relationship between ACE2 and STAT5A**

$\rho = 0.922$ ,  $\hat{r}_{\text{Pearson}} = -0.01$ ,  $CI_{95\%} [-0.22, 0.20]$ ,  $n_{\text{pairs}} = 85$

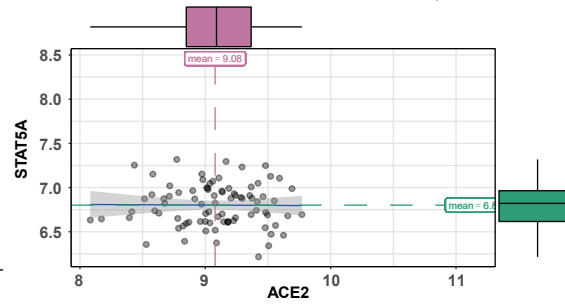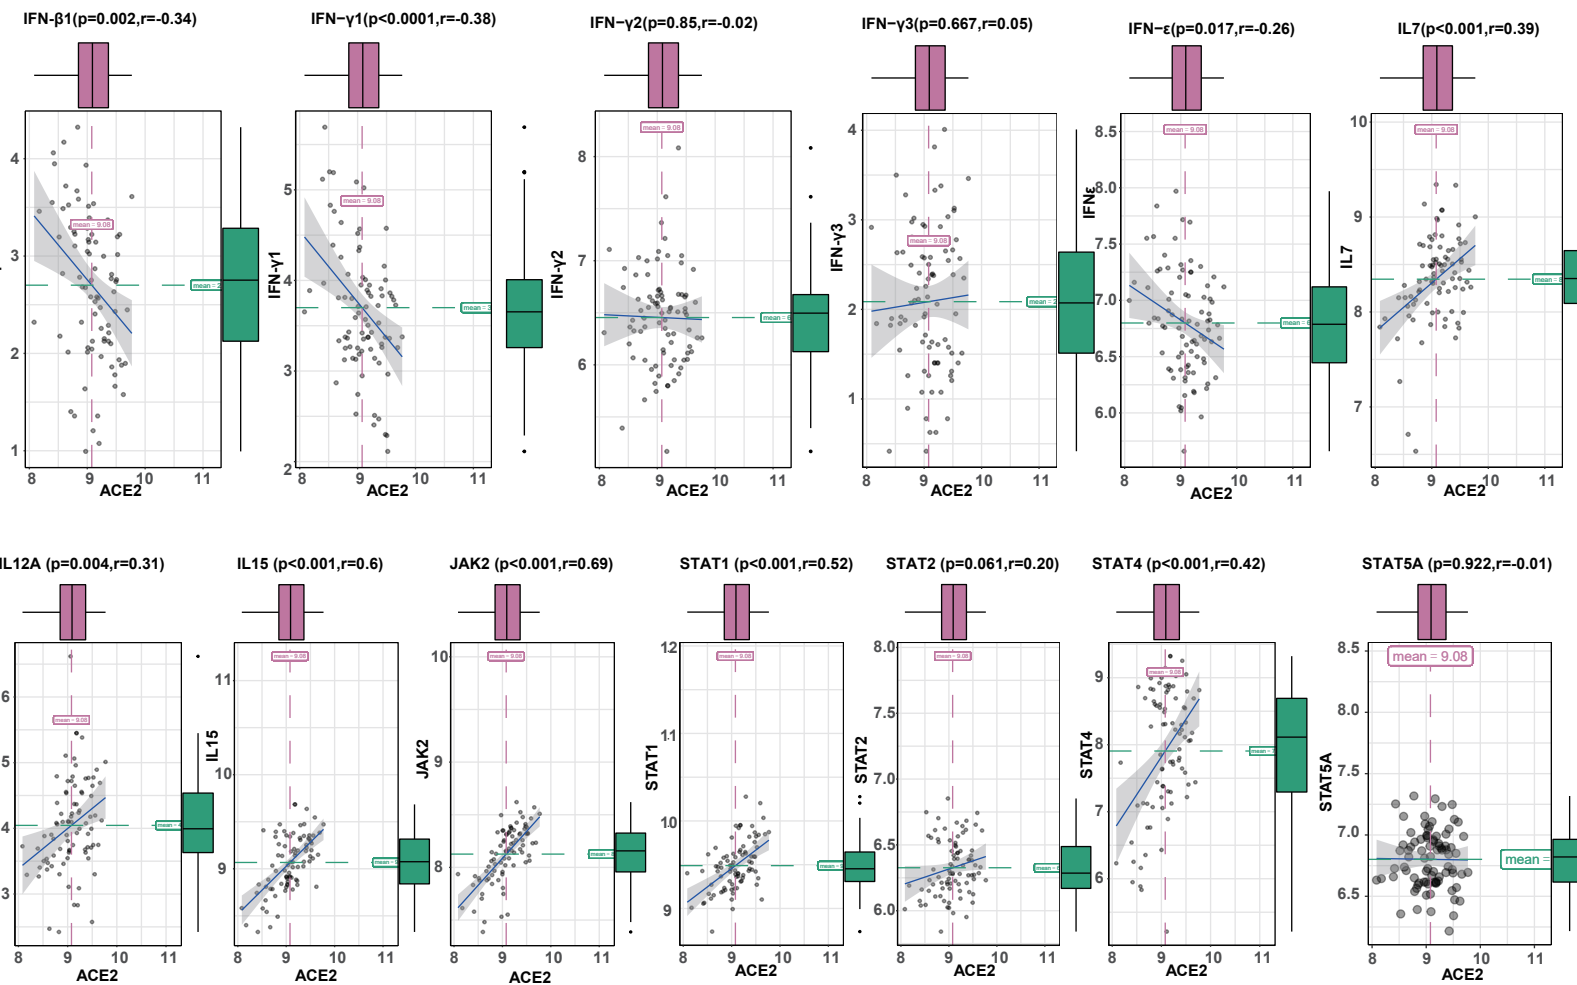

Supplement: mmc1.pdf [file mmc1.pdf]
